# Supplementary material for: Splice-site variant in ACSL5: a marker promoting opposing effect on cell viability and protein expression
Source: PubMed Central journal article supplement (PMC6871522; doi:10.1038/s41431-019-0414-5), 2019-05-03

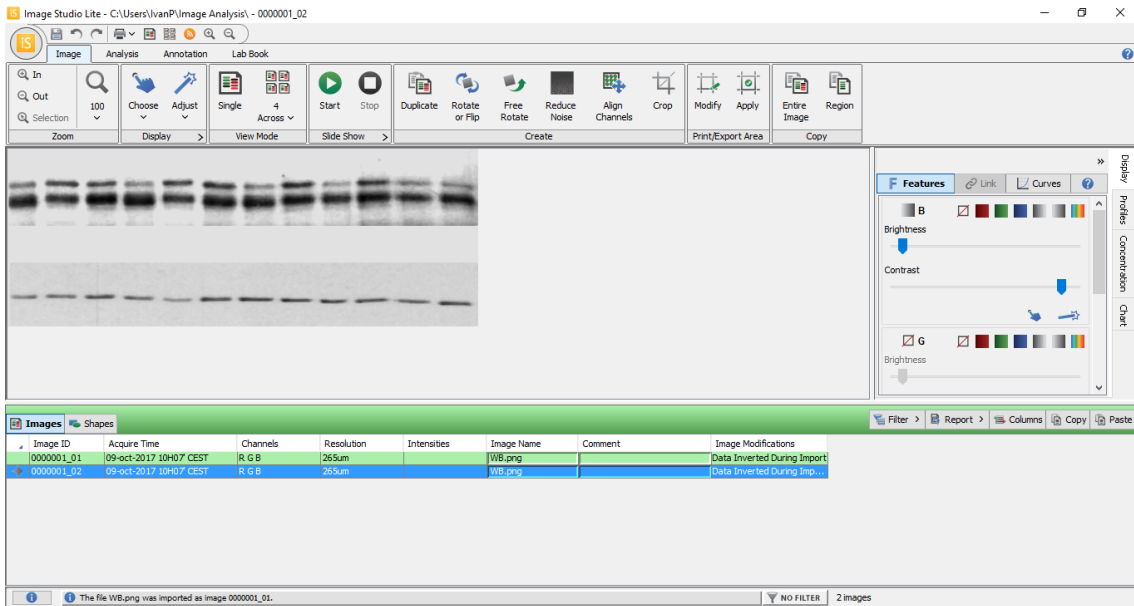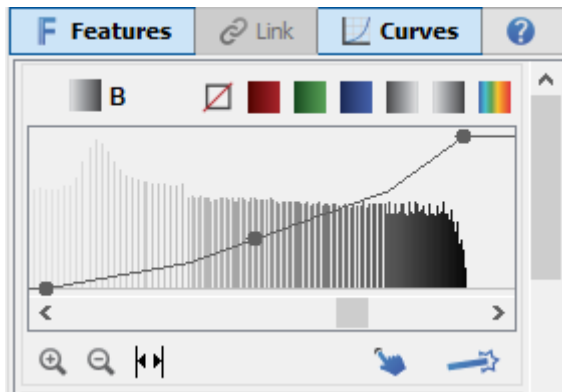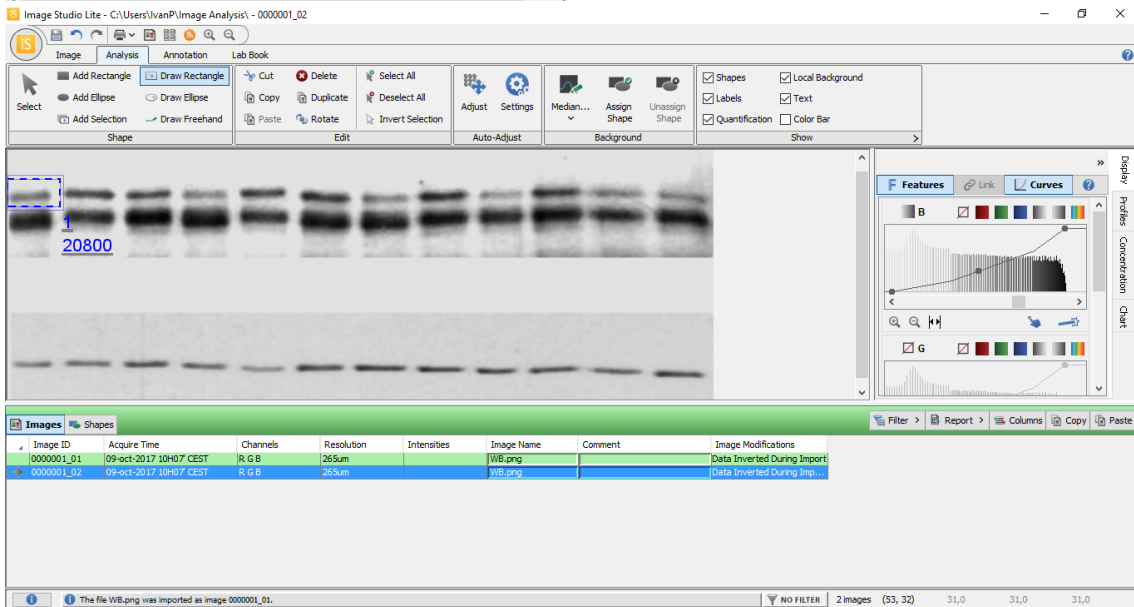

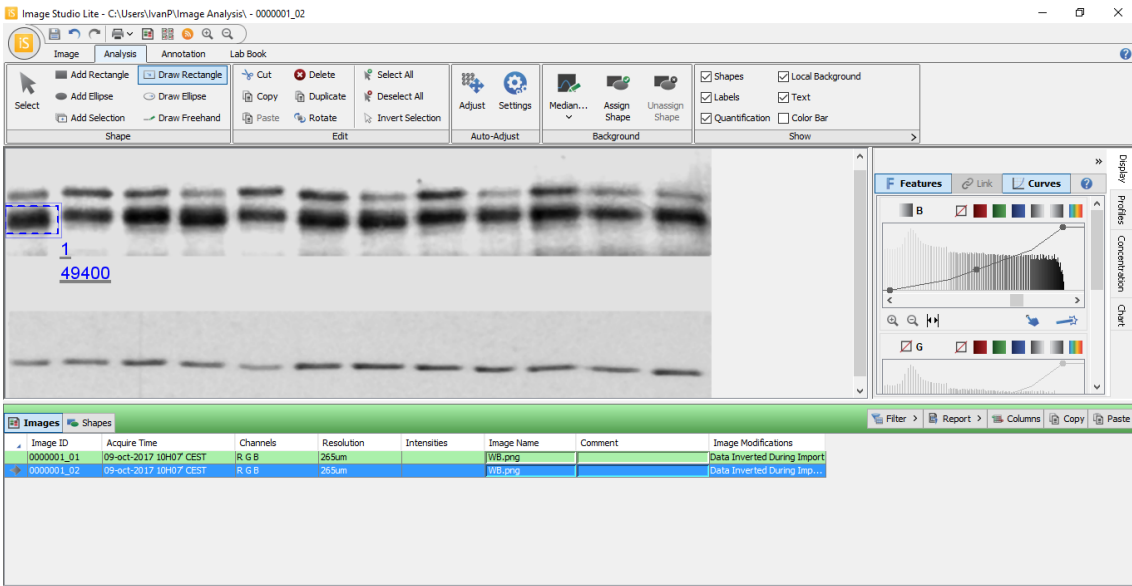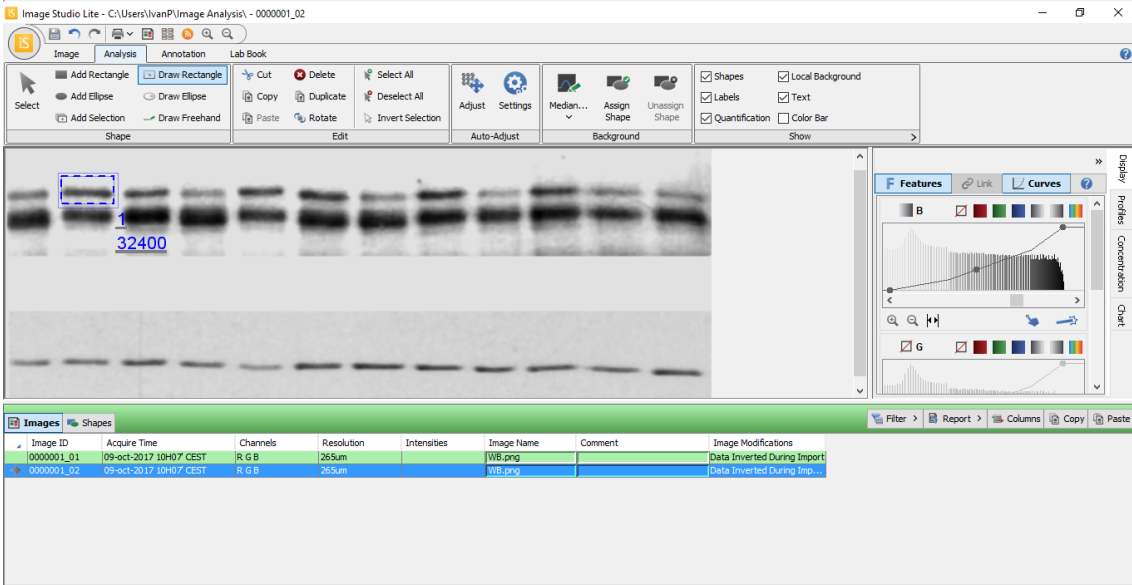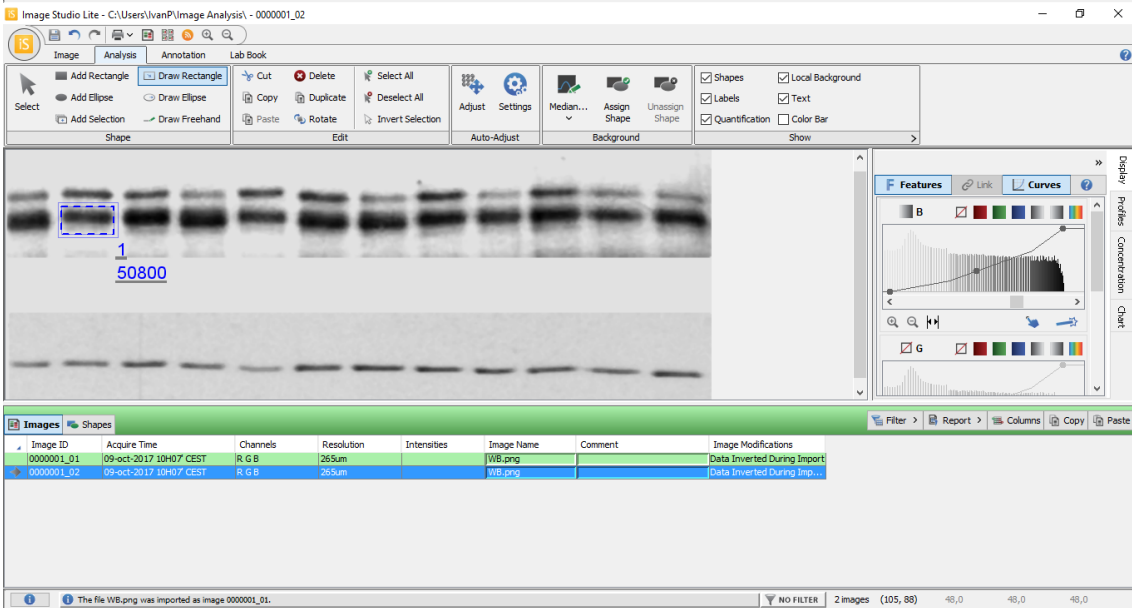

Image Studio Lite - C:\Users\ivanp\image Analysis\ - 0000001\_02

Image Analysis Annotation Lab Book

Add Rectangle Draw Rectangle Cut Delete Select All  
 Add Ellipse Draw Ellipse Copy Duplicate Deselect All  
 Add Selection Draw Freehand Paste Rotate Invert Selection  
 Adjust Settings Median... Assign Shape Unassign Shape  
 Shapes Local Background  
 Labels Text  
 Quantification Color Bar

31300

F Features Link Curves  
 B [Color Swatches]  
 G [Color Swatches]  
 Display Profiles Concentration Chart

| Image ID   | Acquire Time           | Channels | Resolution | Intensities | Image Name | Comment | Image Modifications         |
|------------|------------------------|----------|------------|-------------|------------|---------|-----------------------------|
| 0000001_01 | 09-oct-2017 10H07 CEST | R, G, B  | 25Sum      |             | WB.png     |         | Data Inverted During Import |
| 0000001_02 | 09-oct-2017 10H07 CEST | R, G, B  | 25Sum      |             | WB.png     |         | Data Inverted During Imp... |

The file WB.png was imported as image 0000001\_01. NO FILTER 2 Images (148, 141) 49,0 49,0 49,0

Image Studio Lite - C:\Users\ivanp\image Analysis\ - 0000001\_02

Image Analysis Annotation Lab Book

Add Rectangle Draw Rectangle Cut Delete Select All  
 Add Ellipse Draw Ellipse Copy Duplicate Deselect All  
 Add Selection Draw Freehand Paste Rotate Invert Selection  
 Adjust Settings Median... Assign Shape Unassign Shape  
 Shapes Local Background  
 Labels Text  
 Quantification Color Bar

59500

F Features Link Curves  
 B [Color Swatches]  
 G [Color Swatches]  
 Display Profiles Concentration Chart

| Image ID   | Acquire Time           | Channels | Resolution | Intensities | Image Name | Comment | Image Modifications         |
|------------|------------------------|----------|------------|-------------|------------|---------|-----------------------------|
| 0000001_01 | 09-oct-2017 10H07 CEST | R, G, B  | 25Sum      |             | WB.png     |         | Data Inverted During Import |
| 0000001_02 | 09-oct-2017 10H07 CEST | R, G, B  | 25Sum      |             | WB.png     |         | Data Inverted During Imp... |

The file WB.png was imported as image 0000001\_01. NO FILTER 2 Images (109, 69) 93,0 93,0 93,0

Image Studio Lite - C:\Users\ivanp\image Analysis\ - 0000001\_02

Image Analysis Annotation Lab Book

Add Rectangle Draw Rectangle Cut Delete Select All  
 Add Ellipse Draw Ellipse Copy Duplicate Deselect All  
 Add Selection Draw Freehand Paste Rotate Invert Selection  
 Adjust Settings Median... Assign Shape Unassign Shape  
 Shapes Local Background  
 Labels Text  
 Quantification Color Bar

21100

F Features Link Curves  
 B [Color Swatches]  
 G [Color Swatches]  
 Display Profiles Concentration Chart

| Image ID   | Acquire Time           | Channels | Resolution | Intensities | Image Name | Comment | Image Modifications         |
|------------|------------------------|----------|------------|-------------|------------|---------|-----------------------------|
| 0000001_01 | 09-oct-2017 10H07 CEST | R, G, B  | 25Sum      |             | WB.png     |         | Data Inverted During Import |
| 0000001_02 | 09-oct-2017 10H07 CEST | R, G, B  | 25Sum      |             | WB.png     |         | Data Inverted During Imp... |

The file WB.png was imported as image 0000001\_01. NO FILTER 2 Images (245, 129) 0,00 0,00 0,00

Image Studio Lite - C:\Users\ivanP\image Analysis\ - 0000001\_02

Image Analysis Annotation Lab Book

Add Rectangle Draw Rectangle Cut Delete Select All  
 Add Ellipse Draw Ellipse Copy Duplicate Deselect All  
 Add Selection Draw Freehand Paste Rotate Invert Selection

Adjust Settings Median... Assign Shape Unassign Shape  
 Shapes Local Background  
 Labels Text  
 Quantification Color Bar

1  
59900

F Features Link Curves  
 B [Color Swatches]  
 G [Color Swatches]

| Image ID   | Acquire Time           | Channels | Resolution | Intensities | Image Name | Comment | Image Modifications         |
|------------|------------------------|----------|------------|-------------|------------|---------|-----------------------------|
| 0000001_01 | 09-oct-2017 10H07 CEST | R, G, B  | 25Sum      |             | WB.png     |         | Data Inverted During Import |
| 0000001_02 | 09-oct-2017 10H07 CEST | R, G, B  | 25Sum      |             | WB.png     |         | Data Inverted During Imp... |

NO FILTER 2 Images (171, 61) 166 166 166

Image Studio Lite - C:\Users\ivanP\image Analysis\ - 0000001\_02

Image Analysis Annotation Lab Book

Add Rectangle Draw Rectangle Cut Delete Select All  
 Add Ellipse Draw Ellipse Copy Duplicate Deselect All  
 Add Selection Draw Freehand Paste Rotate Invert Selection

Adjust Settings Median... Assign Shape Unassign Shape  
 Shapes Local Background  
 Labels Text  
 Quantification Color Bar

1  
31400

F Features Link Curves  
 B [Color Swatches]  
 G [Color Swatches]

| Image ID   | Acquire Time           | Channels | Resolution | Intensities | Image Name | Comment | Image Modifications         |
|------------|------------------------|----------|------------|-------------|------------|---------|-----------------------------|
| 0000001_01 | 09-oct-2017 10H07 CEST | R, G, B  | 25Sum      |             | WB.png     |         | Data Inverted During Import |
| 0000001_02 | 09-oct-2017 10H07 CEST | R, G, B  | 25Sum      |             | WB.png     |         | Data Inverted During Imp... |

NO FILTER 2 Images (251, 113) 0,00 0,00 0,00

Image Studio Lite - C:\Users\ivanP\image Analysis\ - 0000001\_02

Image Analysis Annotation Lab Book

Add Rectangle Draw Rectangle Cut Delete Select All  
 Add Ellipse Draw Ellipse Copy Duplicate Deselect All  
 Add Selection Draw Freehand Paste Rotate Invert Selection

Adjust Settings Median... Assign Shape Unassign Shape  
 Shapes Local Background  
 Labels Text  
 Quantification Color Bar

1  
44400

F Features Link Curves  
 B [Color Swatches]  
 G [Color Swatches]

| Image ID   | Acquire Time           | Channels | Resolution | Intensities | Image Name | Comment | Image Modifications         |
|------------|------------------------|----------|------------|-------------|------------|---------|-----------------------------|
| 0000001_01 | 09-oct-2017 10H07 CEST | R, G, B  | 25Sum      |             | WB.png     |         | Data Inverted During Import |
| 0000001_02 | 09-oct-2017 10H07 CEST | R, G, B  | 25Sum      |             | WB.png     |         | Data Inverted During Imp... |

NO FILTER 2 Images (229, 85) 26,0 26,0 26,0

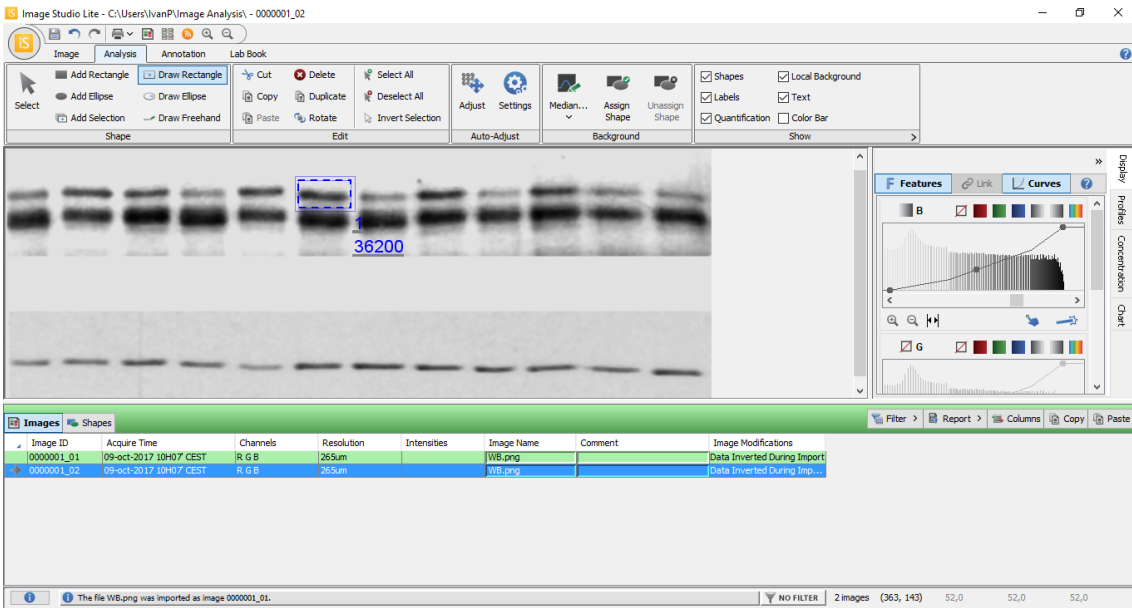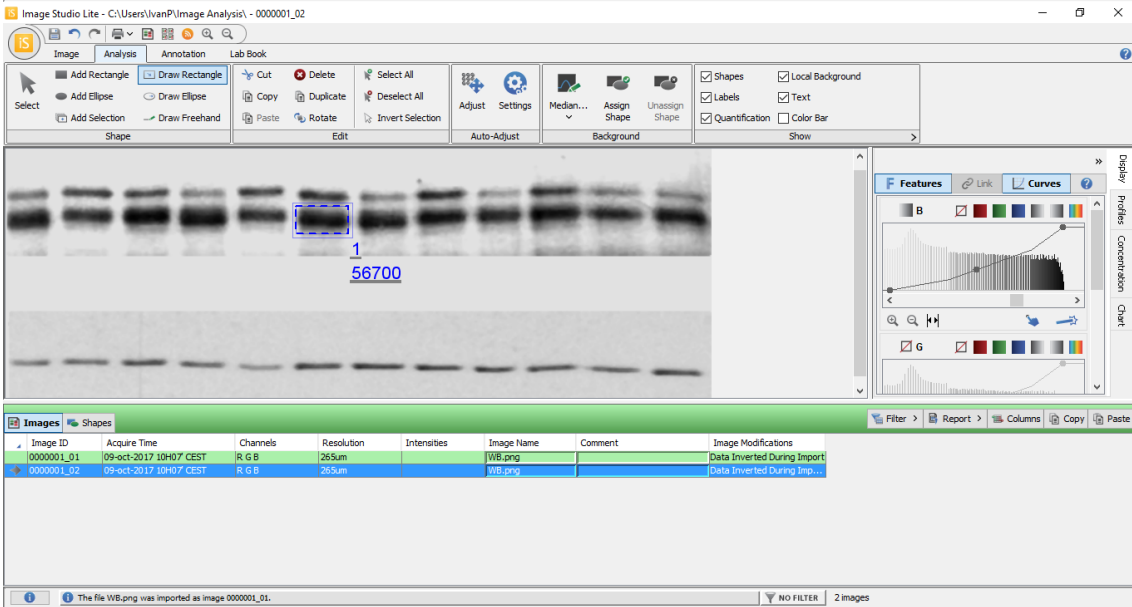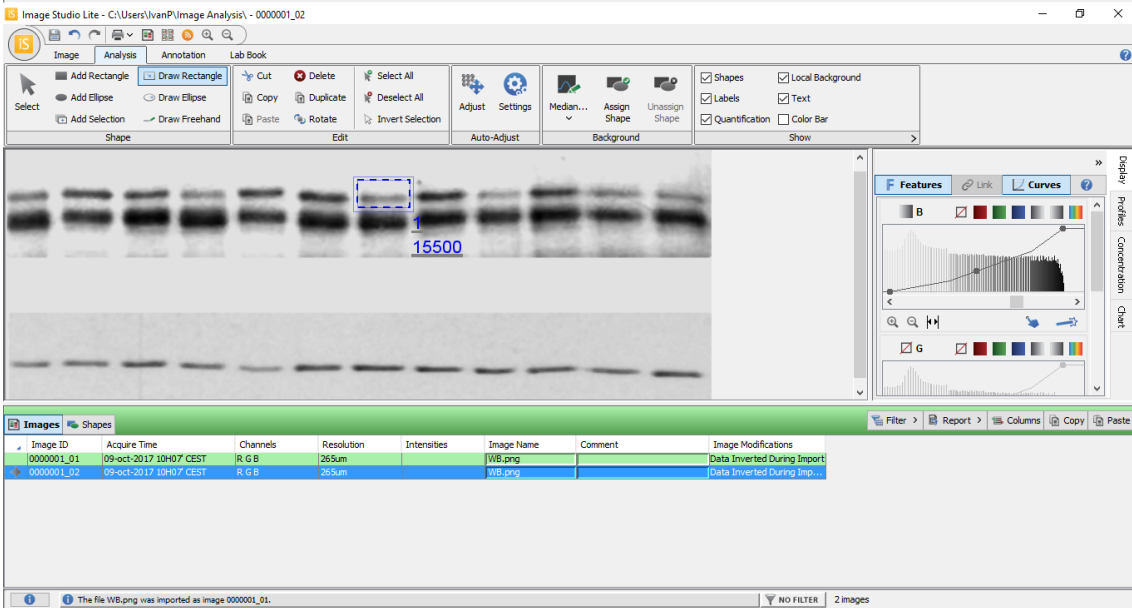

Image Studio Lite - C:\Users\ivanP\image Analysis\ - 0000001\_02

Image Analysis Annotation Lab Book

Add Rectangle Draw Rectangle Cut Delete Select All  
 Add Ellipse Draw Ellipse Copy Duplicate Deselect All  
 Add Selection Draw Freehand Paste Rotate Invert Selection

Adjust Settings Median... Assign Shape Unassign Shape  
 Shapes Local Background Labels Text Quantification Color Bar

1  
50300

F Features Link Curves  
 B [Color Swatches]  
 G [Color Swatches]

| Image ID   | Acquire Time           | Channels | Resolution | Intensities | Image Name | Comment | Image Modifications         |
|------------|------------------------|----------|------------|-------------|------------|---------|-----------------------------|
| 0000001_01 | 09-oct-2017 10H07 CEST | R, G, B  | 25Sum      |             | WB.png     |         | Data Inverted During Import |
| 0000001_02 | 09-oct-2017 10H07 CEST | R, G, B  | 25Sum      |             | WB.png     |         | Data Inverted During Imp... |

NO FILTER | 2 Images (323, 87) | 40,0 | 40,0 | 40,0

Image Studio Lite - C:\Users\ivanP\image Analysis\ - 0000001\_02

Image Analysis Annotation Lab Book

Add Rectangle Draw Rectangle Cut Delete Select All  
 Add Ellipse Draw Ellipse Copy Duplicate Deselect All  
 Add Selection Draw Freehand Paste Rotate Invert Selection

Adjust Settings Median... Assign Shape Unassign Shape  
 Shapes Local Background Labels Text Quantification Color Bar

1  
32200

F Features Link Curves  
 B [Color Swatches]  
 G [Color Swatches]

| Image ID   | Acquire Time           | Channels | Resolution | Intensities | Image Name | Comment | Image Modifications         |
|------------|------------------------|----------|------------|-------------|------------|---------|-----------------------------|
| 0000001_01 | 09-oct-2017 10H07 CEST | R, G, B  | 25Sum      |             | WB.png     |         | Data Inverted During Import |
| 0000001_02 | 09-oct-2017 10H07 CEST | R, G, B  | 25Sum      |             | WB.png     |         | Data Inverted During Imp... |

NO FILTER | 2 Images (373, 85) | 34,0 | 34,0 | 34,0

Image Studio Lite - C:\Users\ivanP\image Analysis\ - 0000001\_02

Image Analysis Annotation Lab Book

Add Rectangle Draw Rectangle Cut Delete Select All  
 Add Ellipse Draw Ellipse Copy Duplicate Deselect All  
 Add Selection Draw Freehand Paste Rotate Invert Selection

Adjust Settings Median... Assign Shape Unassign Shape  
 Shapes Local Background Labels Text Quantification Color Bar

1  
42700

F Features Link Curves  
 B [Color Swatches]  
 G [Color Swatches]

| Image ID   | Acquire Time           | Channels | Resolution | Intensities | Image Name | Comment | Image Modifications         |
|------------|------------------------|----------|------------|-------------|------------|---------|-----------------------------|
| 0000001_01 | 09-oct-2017 10H07 CEST | R, G, B  | 25Sum      |             | WB.png     |         | Data Inverted During Import |
| 0000001_02 | 09-oct-2017 10H07 CEST | R, G, B  | 25Sum      |             | WB.png     |         | Data Inverted During Imp... |

NO FILTER | 2 Images (391, 113) | 0,00 | 0,00 | 0,00

Image Studio Lite - C:\Users\ivanP\image Analysis\ - 0000001\_02

Image Analysis Annotation Lab Book

Add Rectangle Draw Rectangle Cut Delete Select All  
 Add Ellipse Draw Ellipse Copy Duplicate Deselect All  
 Add Selection Draw Freehand Paste Rotate Invert Selection  
 Adjust Settings Median... Assign Shape Unassign Shape  
 Shapes Local Background  
 Labels Text  
 Quantification Color Bar

9160

F Features Link Curves  
 B [Color Swatches]  
 G [Color Swatches]

| Image ID   | Acquire Time           | Channels | Resolution | Intensities | Image Name | Comment | Image Modifications         |
|------------|------------------------|----------|------------|-------------|------------|---------|-----------------------------|
| 0000001_01 | 09-oct-2017 10H07 CEST | R, G, B  | 25Sum      |             | WB.png     |         | Data Inverted During Import |
| 0000001_02 | 09-oct-2017 10H07 CEST | R, G, B  | 25Sum      |             | WB.png     |         | Data Inverted During Imp... |

NO FILTER 2 Images (466, 79) 44,0 44,0 44,0

Image Studio Lite - C:\Users\ivanP\image Analysis\ - 0000001\_02

Image Analysis Annotation Lab Book

Add Rectangle Draw Rectangle Cut Delete Select All  
 Add Ellipse Draw Ellipse Copy Duplicate Deselect All  
 Add Selection Draw Freehand Paste Rotate Invert Selection  
 Adjust Settings Median... Assign Shape Unassign Shape  
 Shapes Local Background  
 Labels Text  
 Quantification Color Bar

40800

F Features Link Curves  
 B [Color Swatches]  
 G [Color Swatches]

| Image ID   | Acquire Time           | Channels | Resolution | Intensities | Image Name | Comment | Image Modifications         |
|------------|------------------------|----------|------------|-------------|------------|---------|-----------------------------|
| 0000001_01 | 09-oct-2017 10H07 CEST | R, G, B  | 25Sum      |             | WB.png     |         | Data Inverted During Import |
| 0000001_02 | 09-oct-2017 10H07 CEST | R, G, B  | 25Sum      |             | WB.png     |         | Data Inverted During Imp... |

NO FILTER 2 Images (437, 115) 0,00 0,00 0,00

Image Studio Lite - C:\Users\ivanP\image Analysis\ - 0000001\_02

Image Analysis Annotation Lab Book

Add Rectangle Draw Rectangle Cut Delete Select All  
 Add Ellipse Draw Ellipse Copy Duplicate Deselect All  
 Add Selection Draw Freehand Paste Rotate Invert Selection  
 Adjust Settings Median... Assign Shape Unassign Shape  
 Shapes Local Background  
 Labels Text  
 Quantification Color Bar

34400

F Features Link Curves  
 B [Color Swatches]  
 G [Color Swatches]

| Image ID   | Acquire Time           | Channels | Resolution | Intensities | Image Name | Comment | Image Modifications         |
|------------|------------------------|----------|------------|-------------|------------|---------|-----------------------------|
| 0000001_01 | 09-oct-2017 10H07 CEST | R, G, B  | 25Sum      |             | WB.png     |         | Data Inverted During Import |
| 0000001_02 | 09-oct-2017 10H07 CEST | R, G, B  | 25Sum      |             | WB.png     |         | Data Inverted During Imp... |

NO FILTER 2 Images (481, 35) 55,0 55,0 55,0

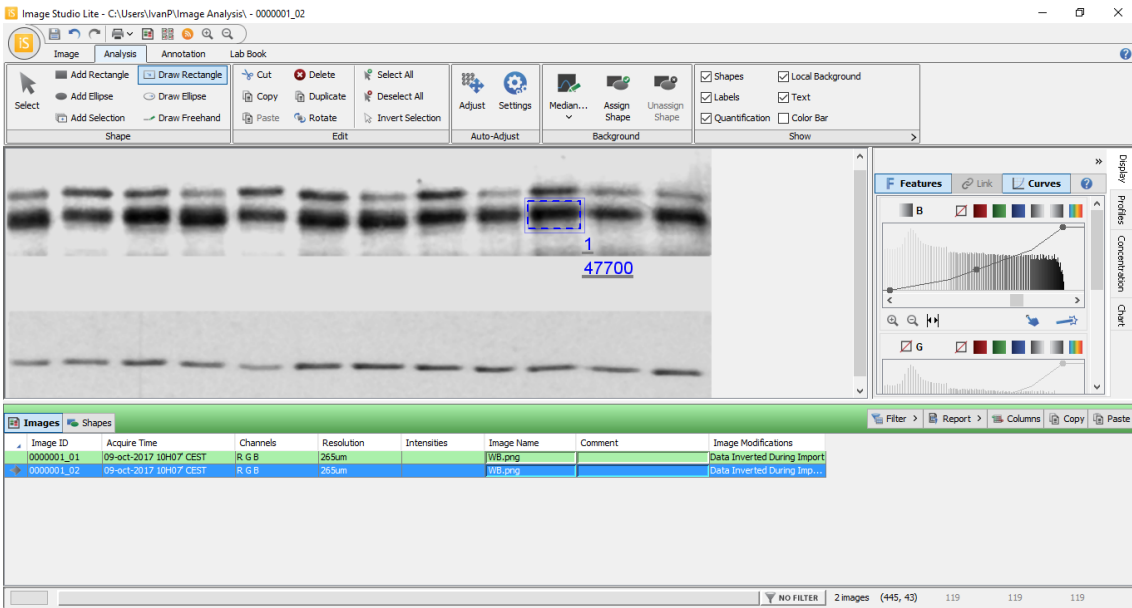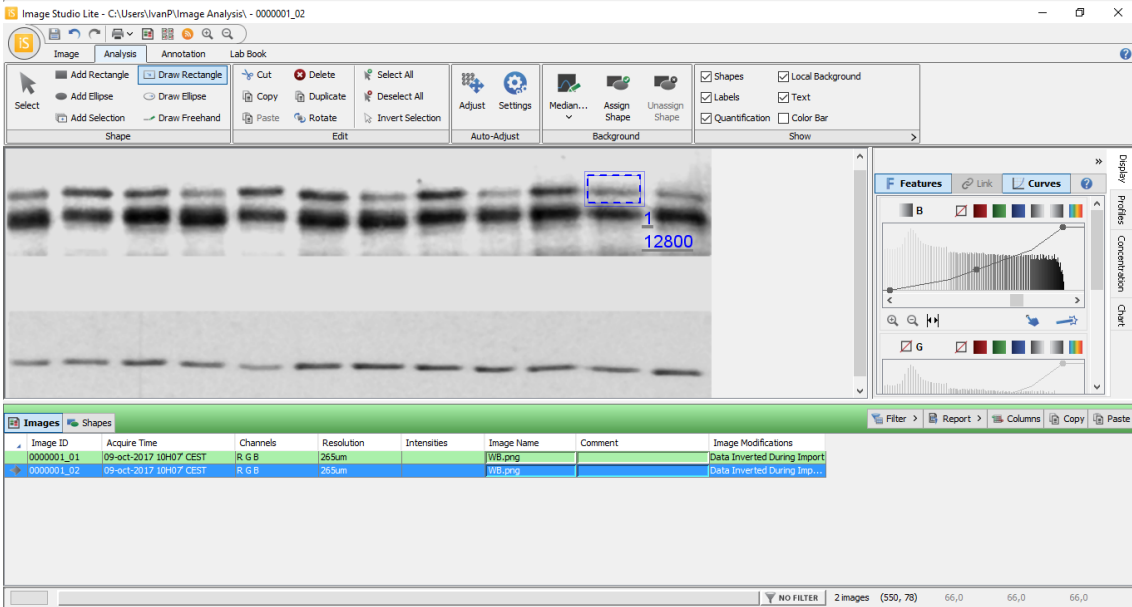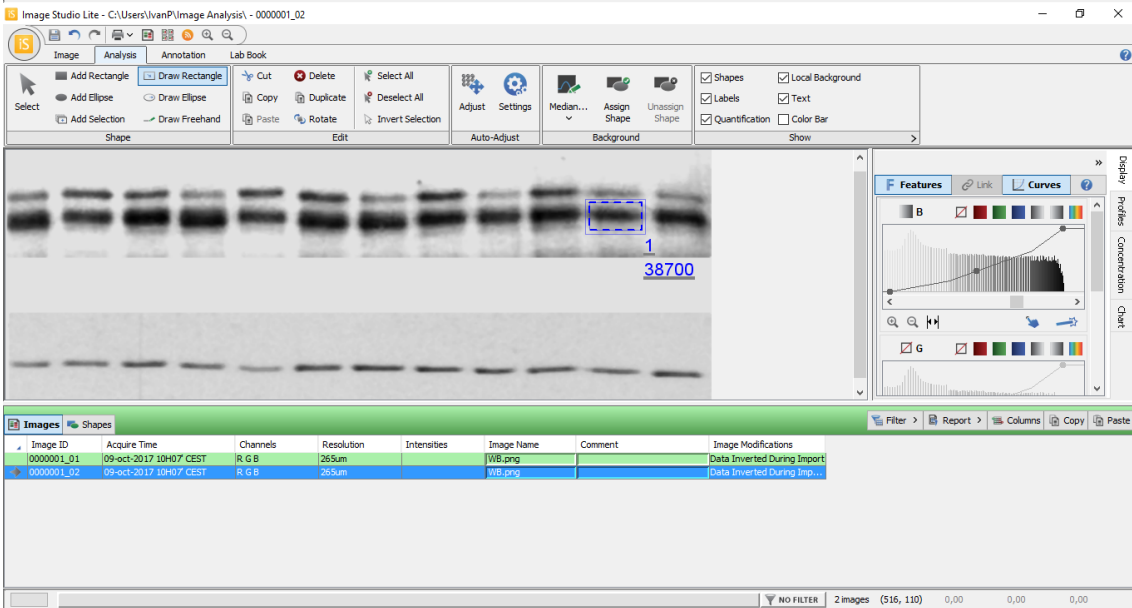



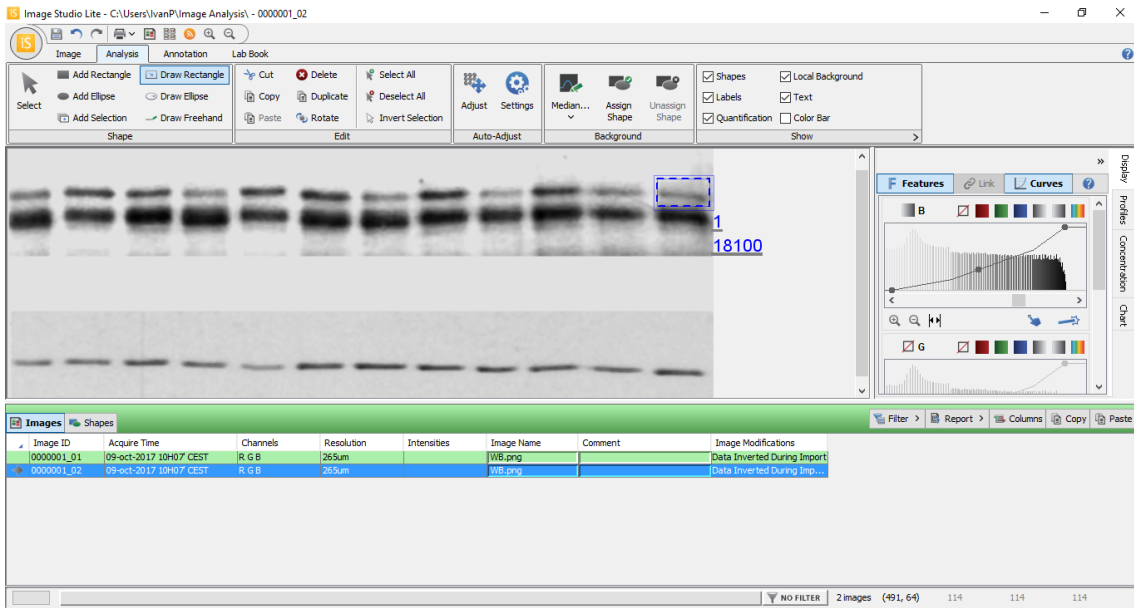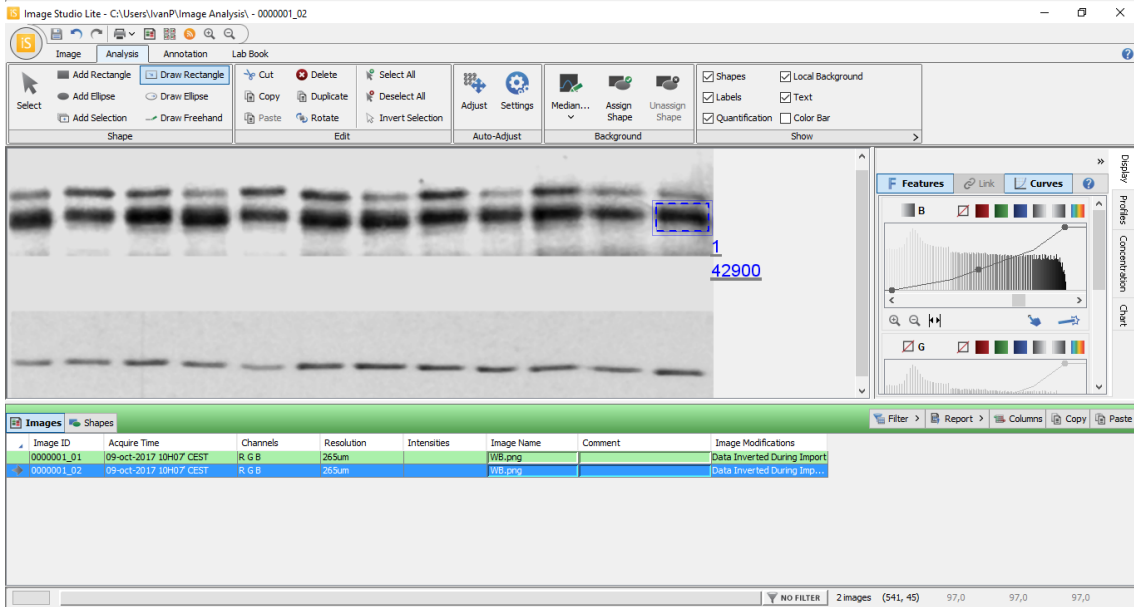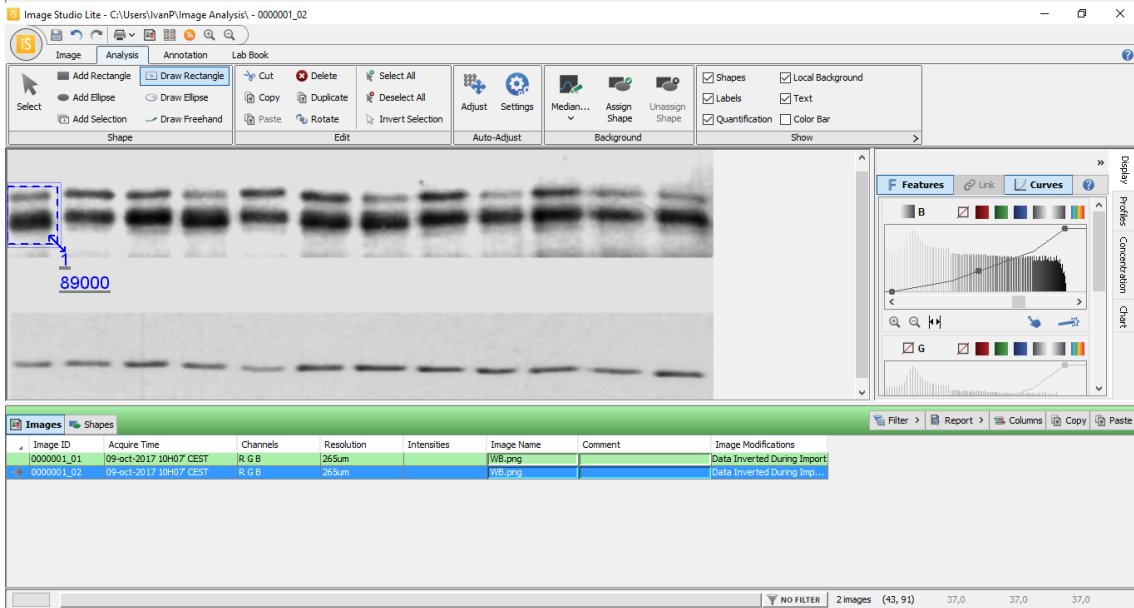

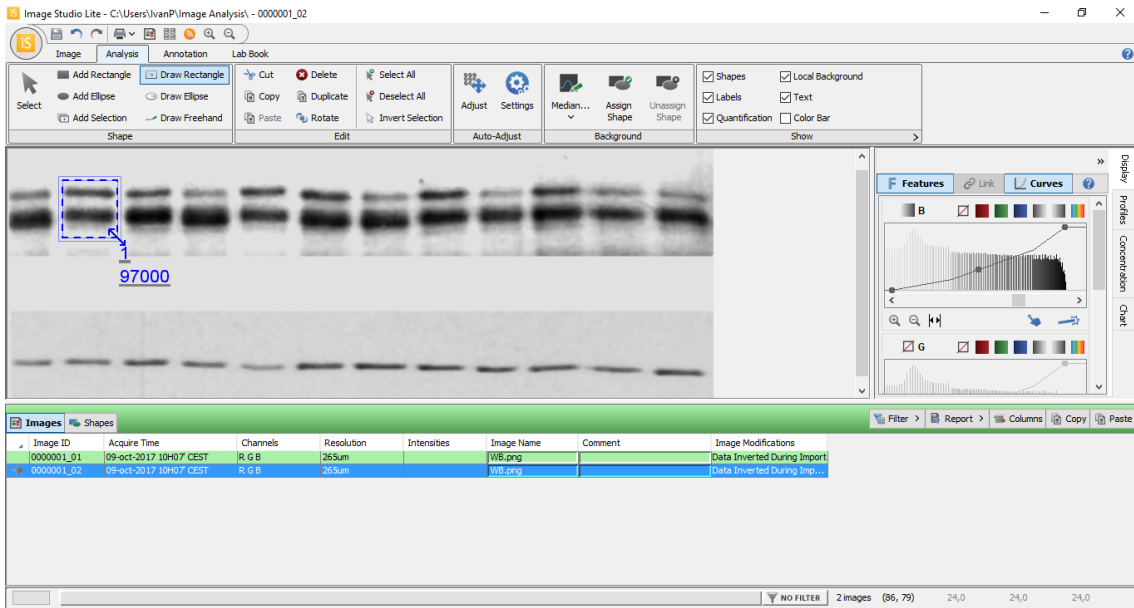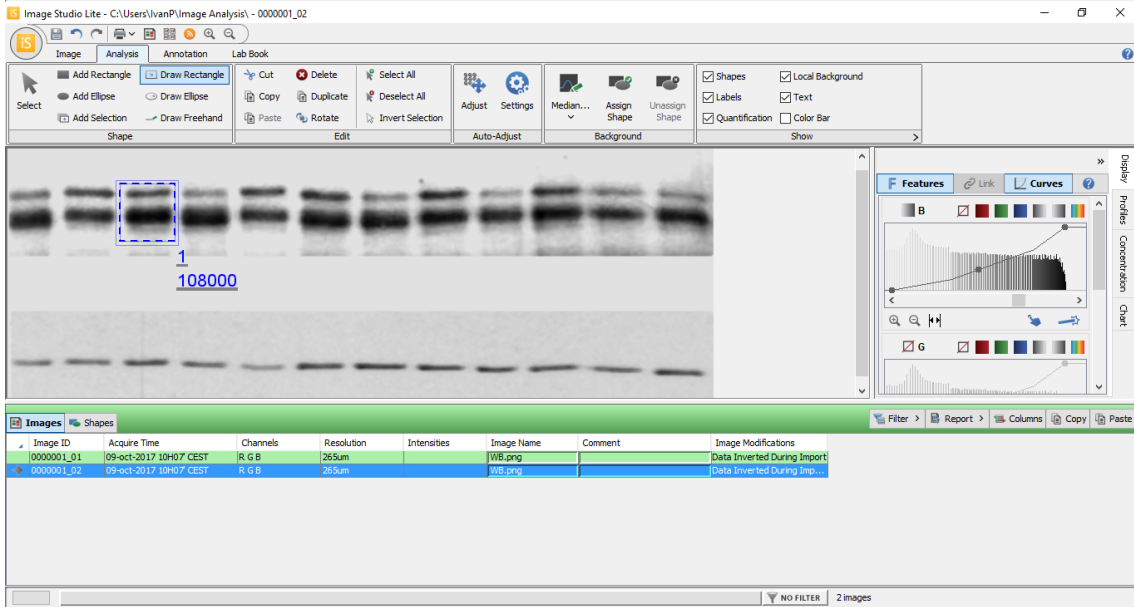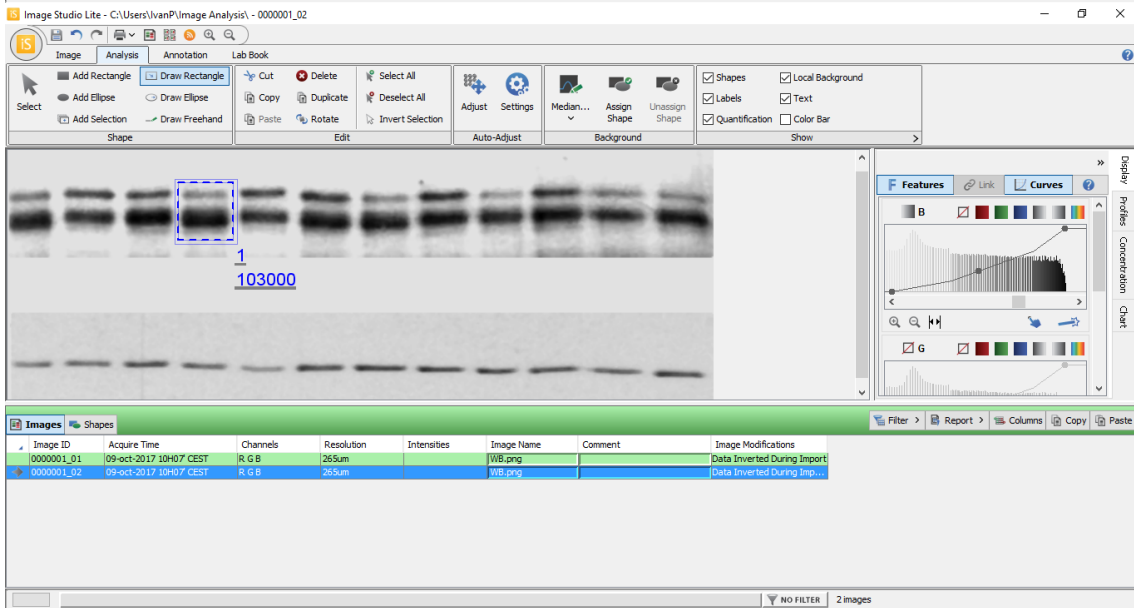

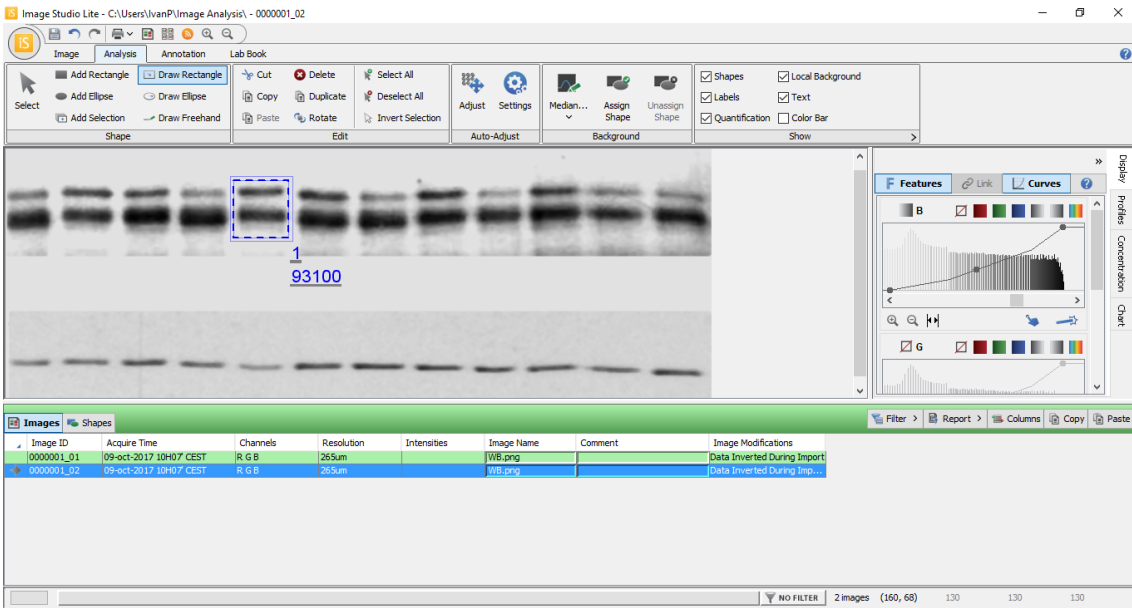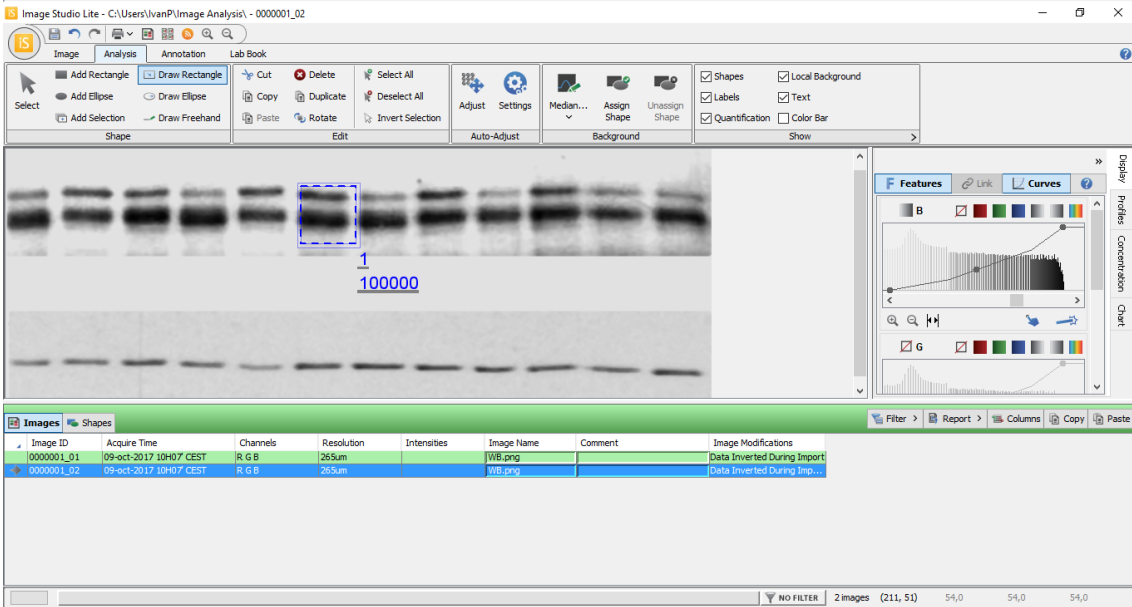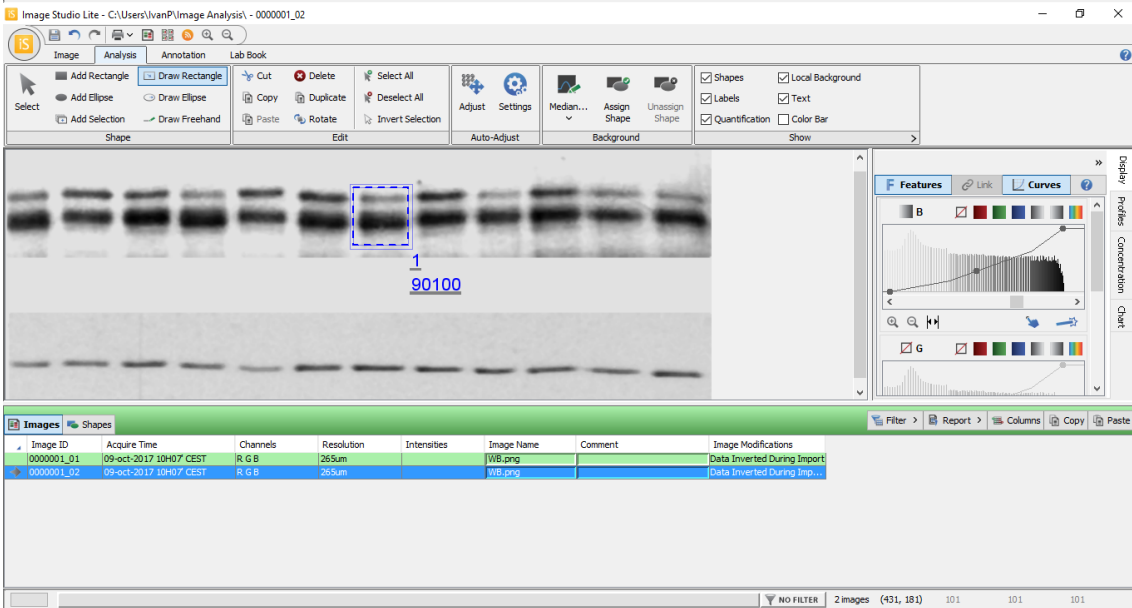

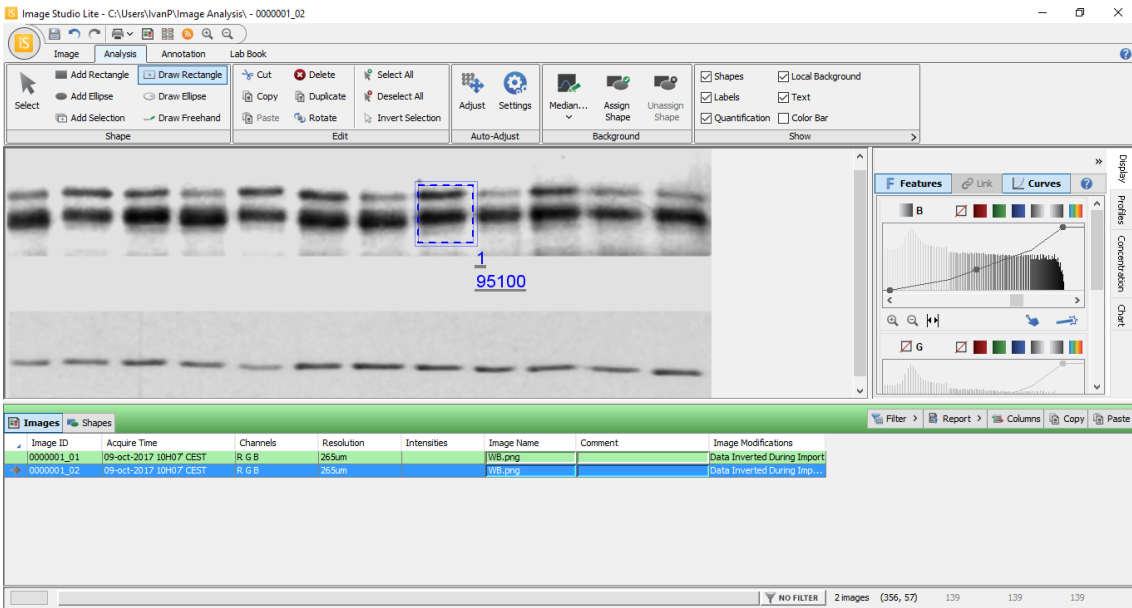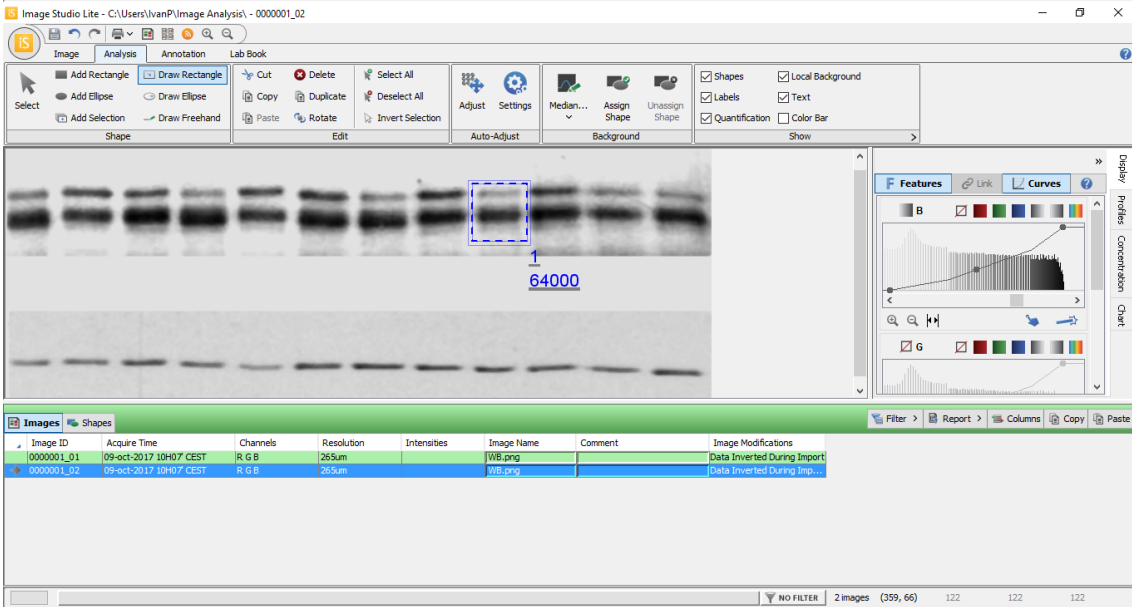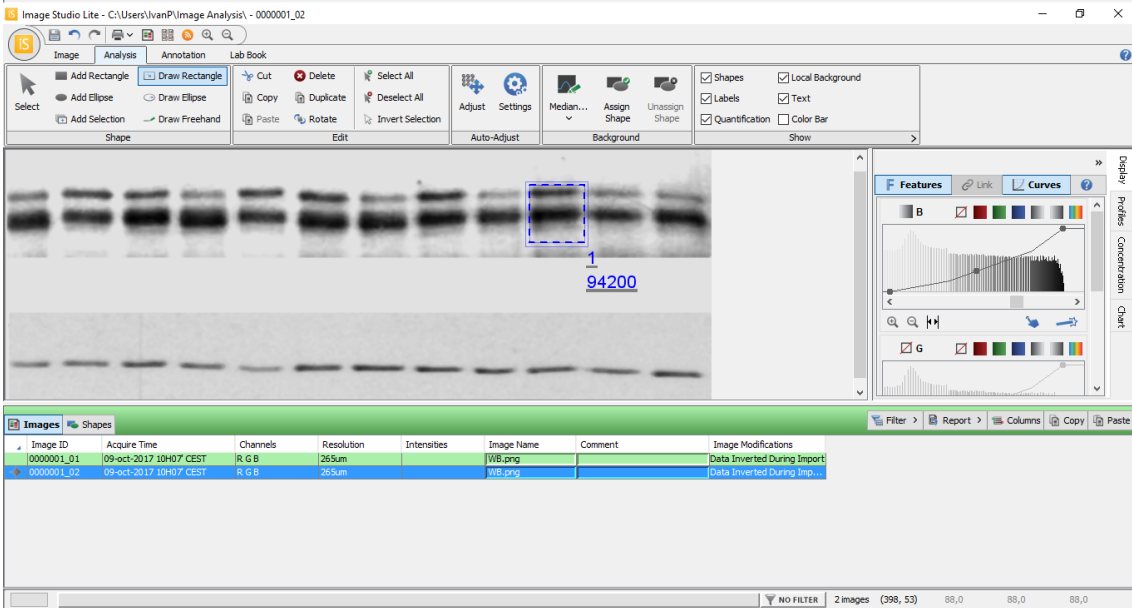

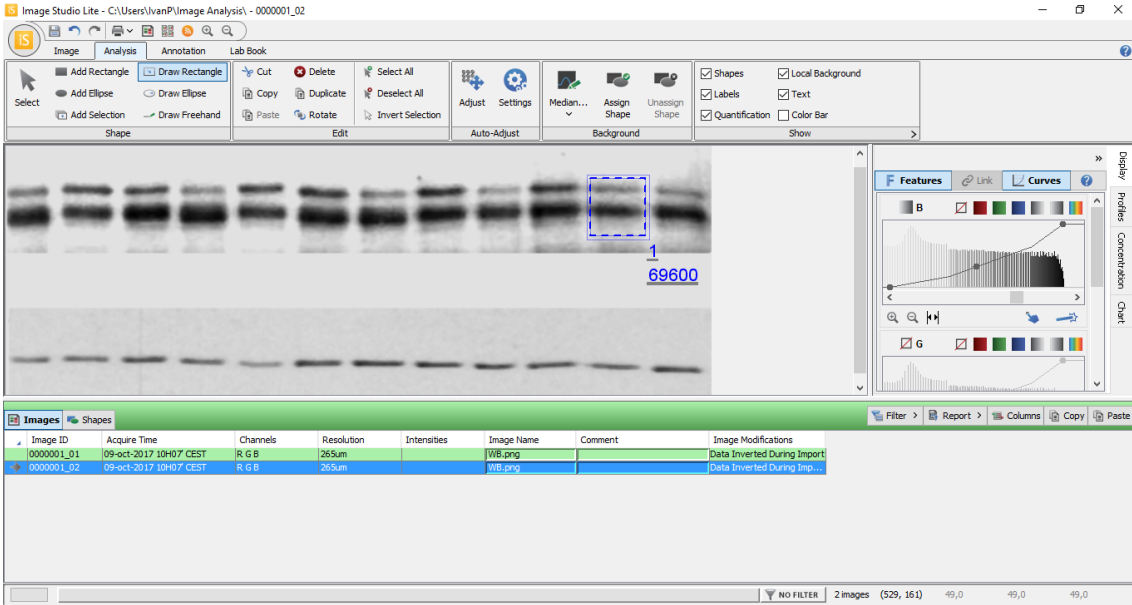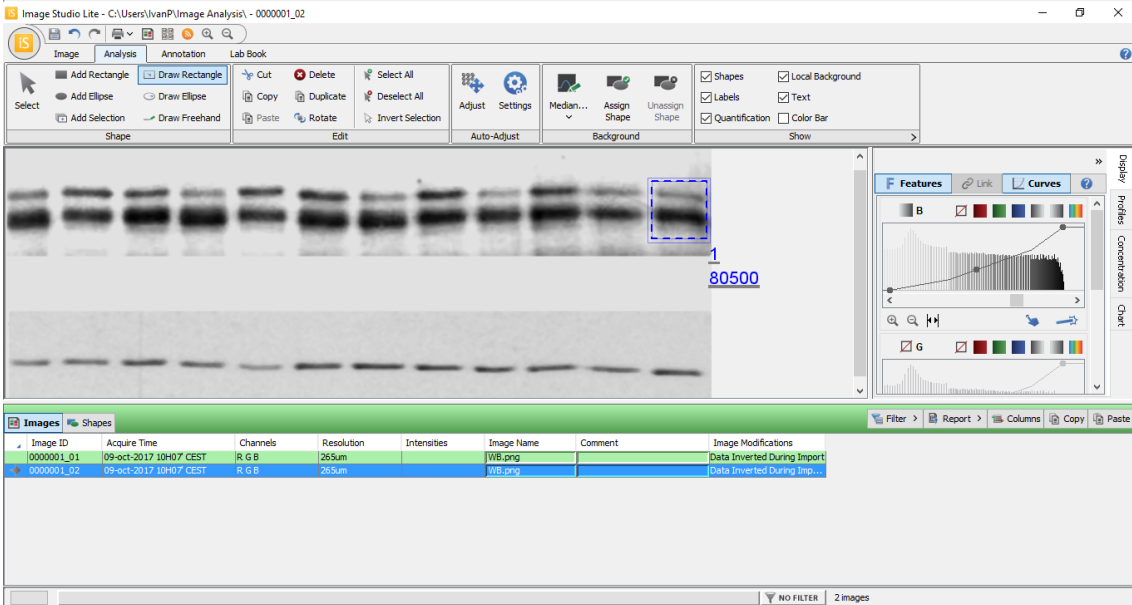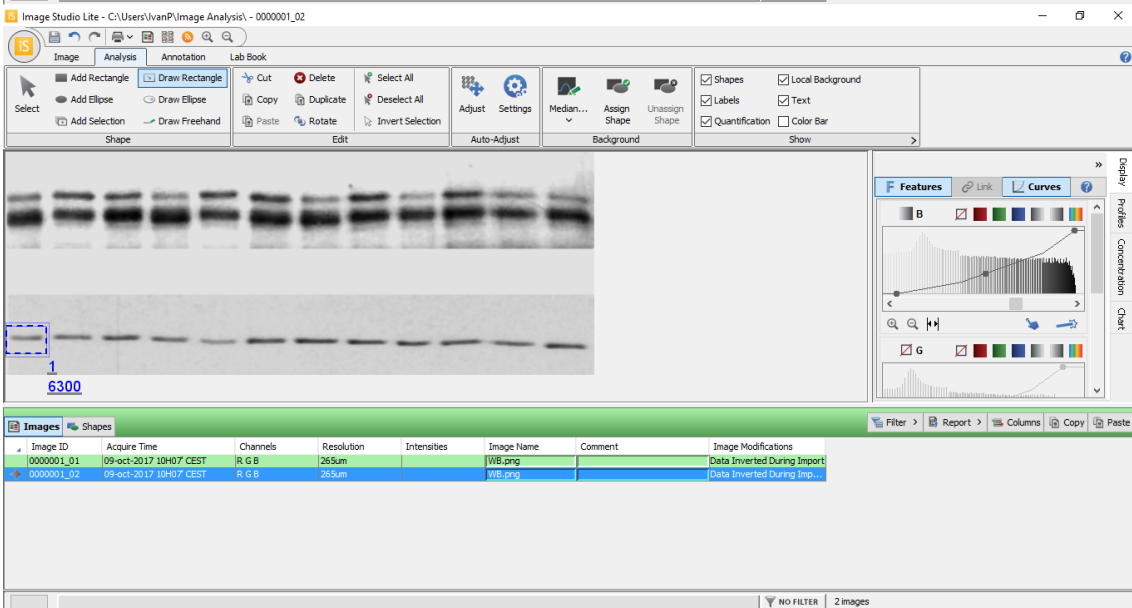

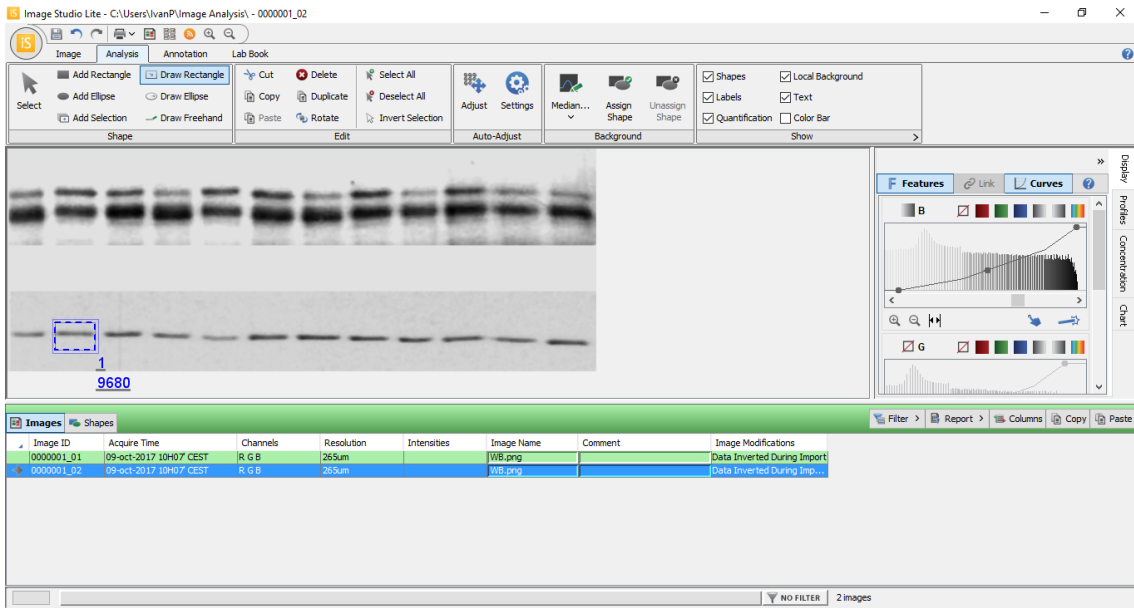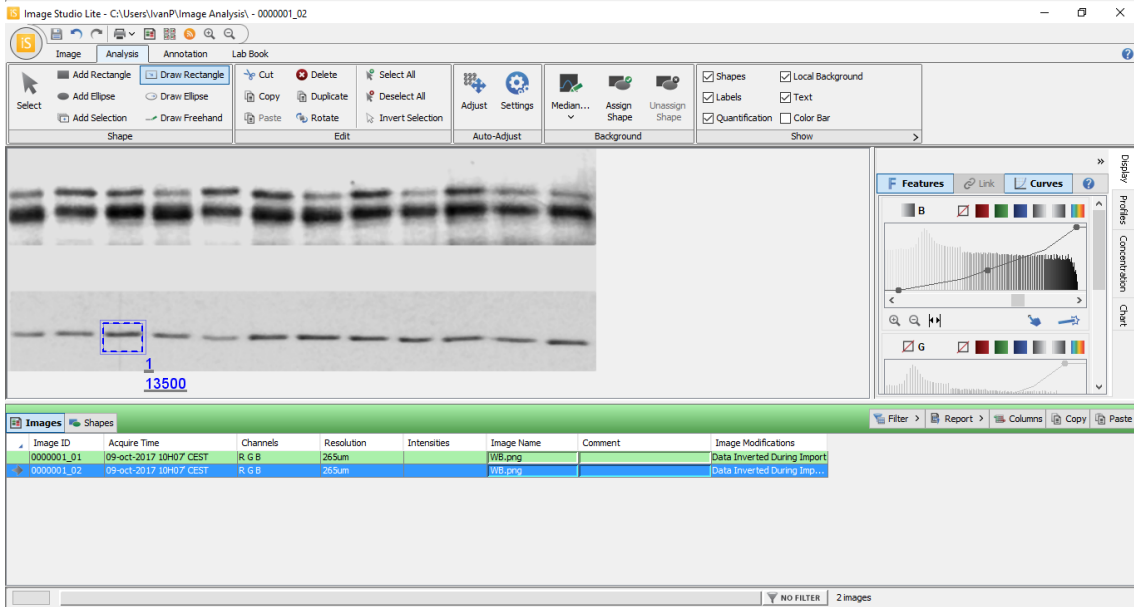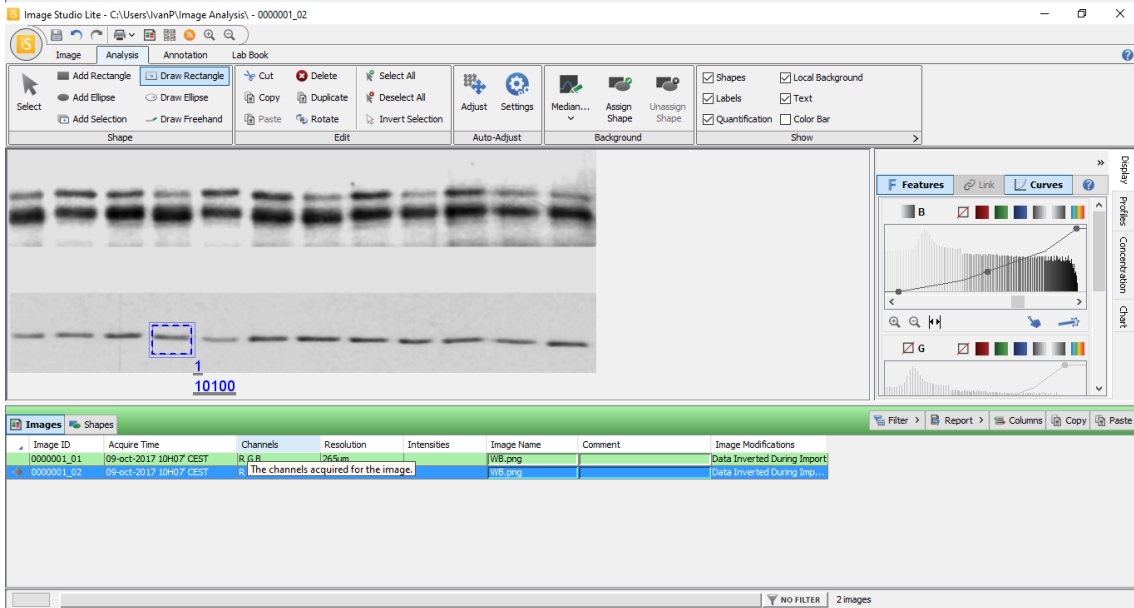

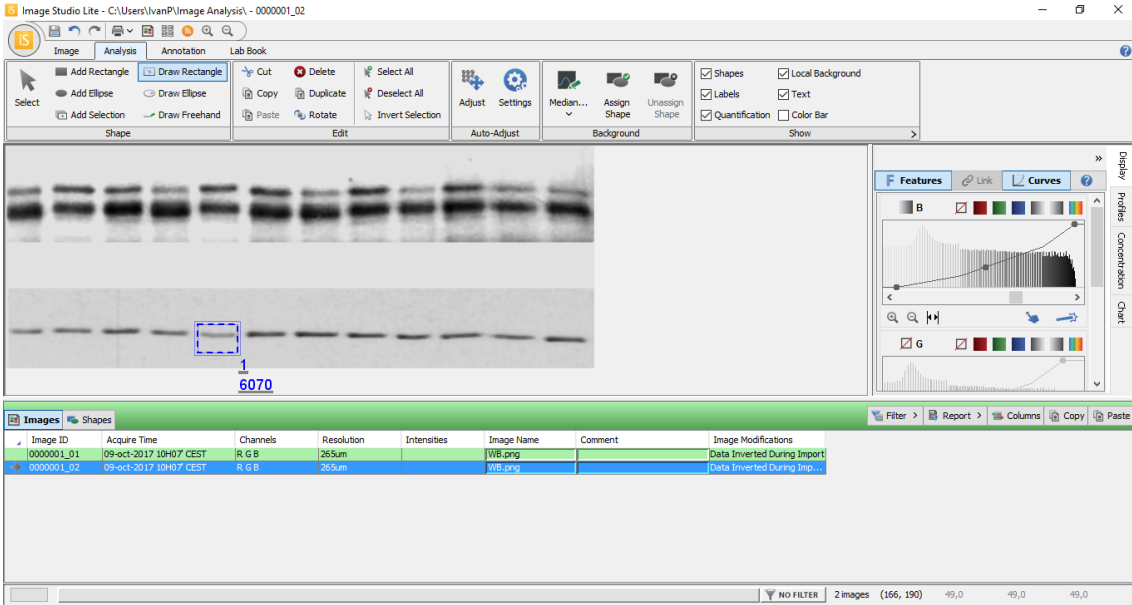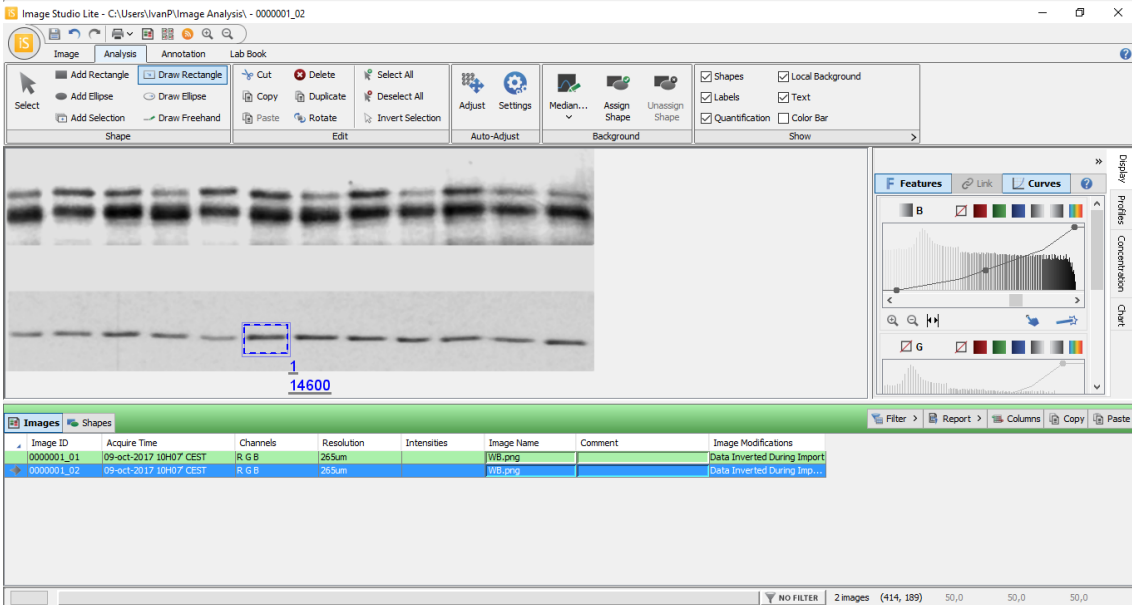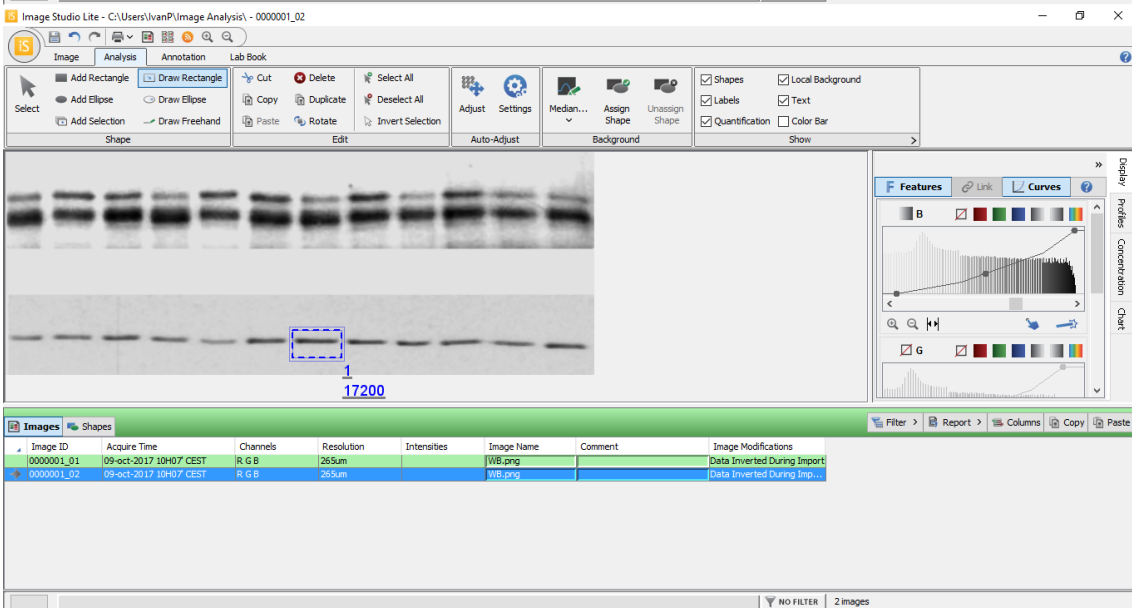

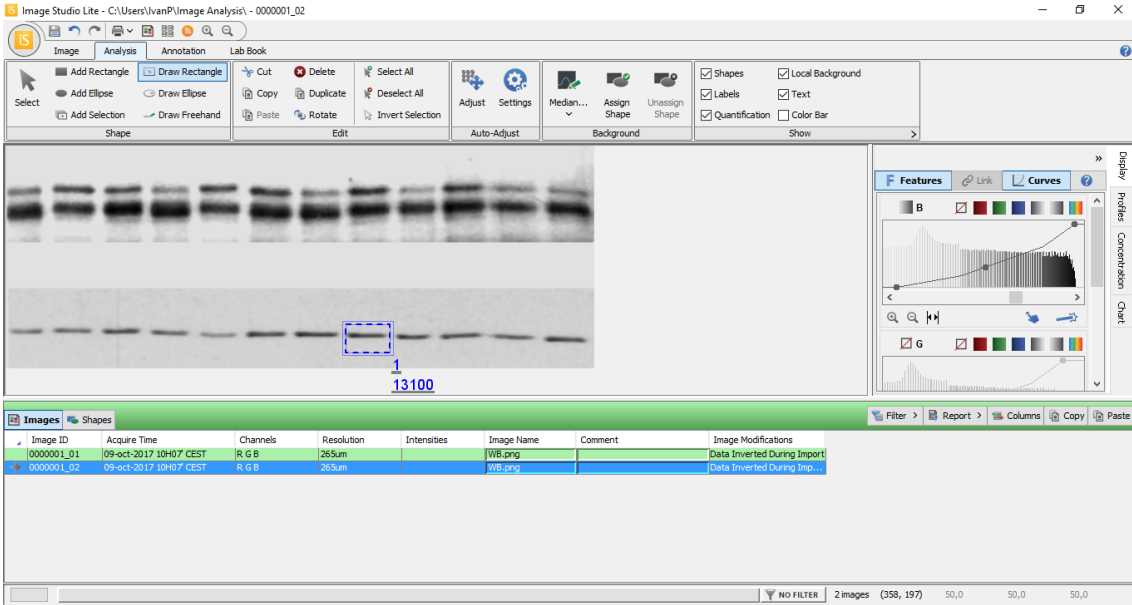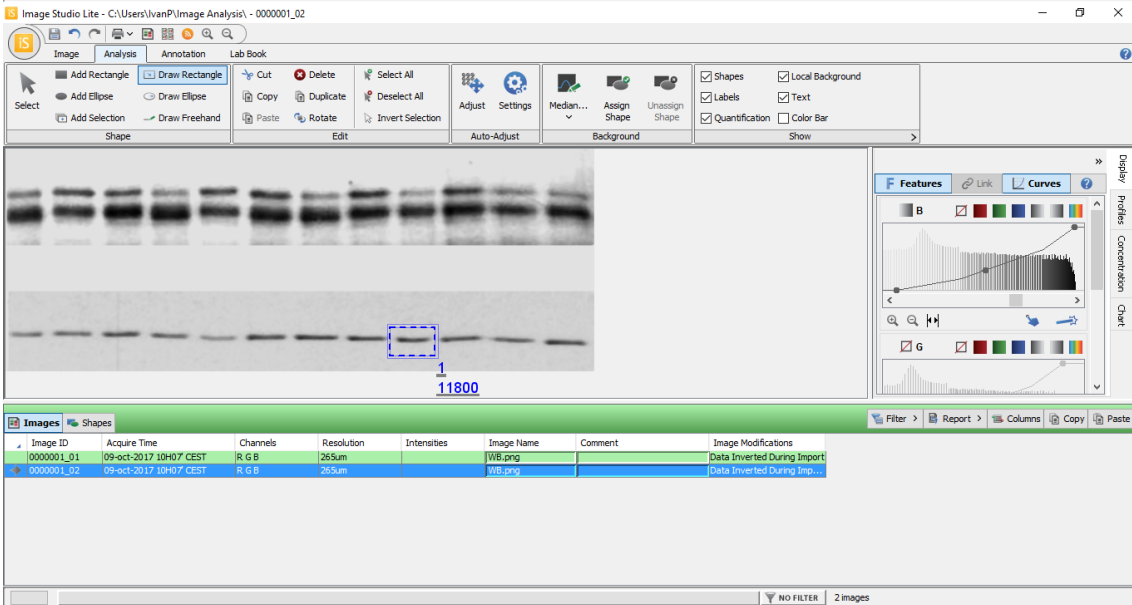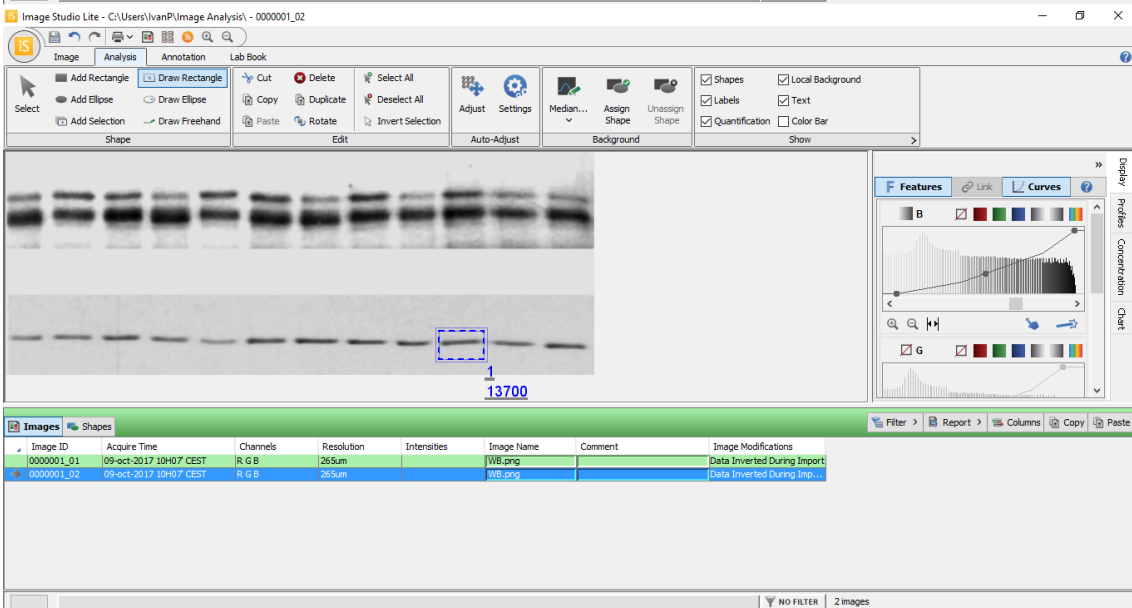



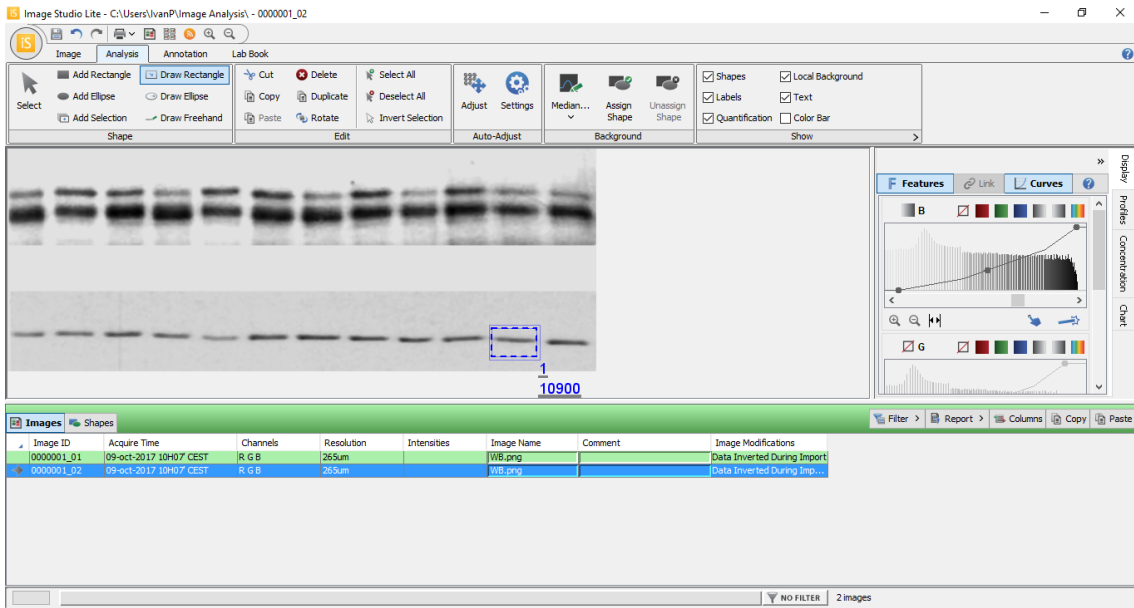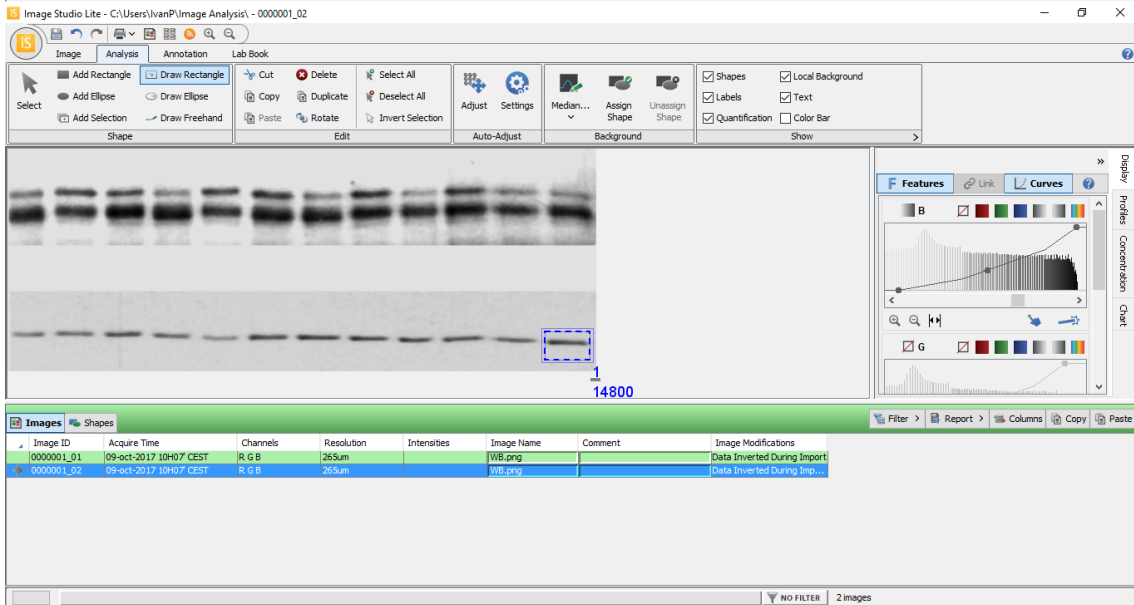

Supplement: 41431_2019_414_MOESM1_ESM.pdf [file 41431_2019_414_MOESM1_ESM.pdf]
